# On the hybrid origin of the C<sub>2</sub> *Salsola divaricata* agg. (Amaranthaceae) from C<sub>3</sub> and C<sub>4</sub> parental lineages

Delphine T. Tefarikis<sup>1\*</sup>, Diego F. Morales-Briones<sup>2</sup>, Ya Yang<sup>2</sup>, Gerald Edwards<sup>3</sup> & Gudrun Kadereit<sup>1,4</sup>

<sup>1</sup> AG Biodiversity and Evolution of Plants, Institute of Molecular Physiology, Johannes Gutenberg University Mainz, Mainz, Germany

<sup>2</sup> Department of Plant and Microbial Biology, University of Minnesota–Twin Cities, St. Paul, MN, USA

<sup>3</sup> School of Biological Sciences, Washington State University, Pullman, WA, USA

<sup>4</sup> Section Systematics, Biodiversity and Evolution of Plants, Ludwig Maximilians University Munich, Germany

\* **Correspondence:** Delphine T. Tefarikis; tefarikisd@gmail.com

**Total word count: 6,989**

**Summary: 200**

**Introduction: 835**

**Material & Methods: 1500**

**Results: 2349**

**Discussion: 2115**

**Conclusion: 190**

**Figures: 6 (only Figure 6 in color)**

**Tables: 2**

**Supporting Information:**

Figures S1 – S8;

Tables S1– S3;

Material & Methods S1.

## Abstract

- C<sub>2</sub> photosynthesis is characterized by recapturing photorespiratory CO<sub>2</sub> by RuBisCO in Kranz-like cells and is therefore physiologically intermediate between C<sub>3</sub> and C<sub>4</sub> photosynthesis. C<sub>2</sub> is either interpreted as an evolutionary precursor of C<sub>4</sub> or as the result of hybridization between a C<sub>3</sub> and C<sub>4</sub> lineage.
- We compared the expression of photosynthetic traits among populations of the *Salsola divaricata* agg. (C<sub>2</sub>) from humid subtropical to arid habitats on the coasts of the Canary Islands and Morocco, and subjected them to salt and drought treatments. We screened for enhanced C<sub>4</sub>-like expression of traits related to habitat or treatment. We estimated species trees with a transcriptome dataset of Salsoleae and explored patterns of gene tree discordance. With phylogenetic networks and hybridization analyses we tested for hybrid origin of the *Salsola divaricata* agg.
- We observed independent variation of photosynthetic traits within and among populations and no clear evidence for selection towards C<sub>4</sub>-like trait expression in more stressful habitats or treatments. We found reticulation and gene tree incongruencies in the Salsoleae supporting a putative hybrid origin of the *Salsola divaricata* agg.
- C<sub>2</sub> photosynthesis in the *Salsola divaricata* agg. combines traits inherited from its C<sub>3</sub> and C<sub>4</sub> parental lineages and seems well adapted to a wide climatic amplitude.

**Keywords:** C<sub>2</sub> photosynthesis, carbon isotope values, CO<sub>2</sub> compensation point, Chenopodiaceae, phosphoenolpyruvate carboxylase, *Salsola divaricata* agg., phylogenomics, hybridization events.

## Introduction

In current models of C<sub>4</sub> evolution, the C<sub>3</sub>-C<sub>4</sub> intermediate phenotypes (including C<sub>2</sub> plants) are interpreted as a transitional, evolutionary link between the ancestral C<sub>3</sub> photosynthesis pathway and the derived C<sub>4</sub> pathway and showcase the complexity of the numerous structural, genetic and functional changes necessary to establish a functioning C<sub>4</sub> pathway (Bräutigam & Gowik, 2016; Schlüter & Weber, 2016). There are about 50 known species with intermediate photosynthetic traits, some of which do not share a common ancestor with one of the more than 60 independent C<sub>4</sub> lineages (Sage *et al.*, 2011), and some of which represent lineages up to 20 or even 30 million years in their crown age (Sage *et al.*, 2018). The fact that we are able to observe these intermediate phenotypes in nature repeatedly implies that they are evolutionary stable (Lundgren, 2020). Their phenotypic diversity has been classified into four photosynthetic categories of C<sub>3</sub>-C<sub>4</sub> intermediacy: proto-Kranz, C<sub>2</sub> type I, C<sub>2</sub> type II and C<sub>4</sub>-like (Sage *et al.*, 2014). In particular, C<sub>2</sub> photosynthesis has been interpreted as a crucial stepping stone towards C<sub>4</sub> photosynthesis. In C<sub>2</sub> species the photorespiratory enzyme glycine decarboxylase (GDC) is restricted to the bundle sheath or Kranz-like cells and mitochondria are absent or distinctly reduced in the mesophyll cells. This induces a photorespiratory glycine shuttle to the bundle sheath cells where the glycine is then processed by GDC and the photorespiratory CO<sub>2</sub> is recaptured by RuBisCO (Schulze *et al.*, 2016).

Bräutigam & Gowik (2016) propose that once the photorespiratory CO<sub>2</sub> pump is active, establishing the C<sub>4</sub> cycle is inevitable. According to this model, a strong selective pressure towards an increase of phosphoenolpyruvate carboxylase (PEPC) activity in C<sub>2</sub> species should be expected under carbon deficient conditions (Bräutigam & Gowik, 2016).

An alternative to the evolution of C<sub>3</sub> to intermediates to C<sub>4</sub> is the proposed occurrence of intermediates through hybridization (Monson *et al.*, 1984). Experimental hybrids of C<sub>3</sub> and C<sub>4</sub> species (e.g., Oakley *et al.*, 2014) reveal similar phenotypes as naturally occurring C<sub>3</sub>-C<sub>4</sub> intermediate species (Brown & Bouton, 1993). Furthermore, conflicting topologies in molecular phylogenetic studies which include C<sub>3</sub>-C<sub>4</sub> intermediate species indicate possible hybridization events in the evolutionary history of these lineages (reviewed in Kadereit *et al.*, 2017). To investigate the possibility of a hybrid origin of a C<sub>2</sub> lineage, detailed phylogenomic studies are needed; however, such a study has not been conducted so far.

We conducted a study of a C<sub>2</sub> species at the population level and looked at C<sub>4</sub>-adaptive traits to provide empirical evidence for one of the two alternative hypotheses. In the case of C<sub>3</sub>-C<sub>4</sub> intermediates being evolutionary stepping stones and according to the model proposed by Bräutigam & Gowik (2016), we would expect a pattern of populations showing shifts towards more C<sub>4</sub>-like traits under stressful conditions. In the case of C<sub>3</sub>-C<sub>4</sub> intermediates resulting from hybridization, we would expect independent segregation of C<sub>4</sub>-traits as has been found in several hybridization experiments (Björkman *et al.*, 1969; Holaday *et al.*, 1985; Cameron *et al.*, 1989; Brown *et al.*, 1993; Brown & Bouton, 1993; Oakley *et al.*, 2014).

The C<sub>2</sub> species we chose for our study is *Salsola divaricata* Moq. (Amaranthaceae, subfamily Salicornioideae, tribe Salsoleae; Schüssler *et al.*, 2017; Morales-Briones *et al.*, 2021) and its close relatives *S. verticillata* Schousb., *S. gymnomaschala* Maire and *S. deschaseauxiana* Litard. & Maire (hereafter called the *S. divaricata* agg.). The distribution area of the *Salsola divaricata* agg. on the Canary Islands and the coasts of Western Morocco, spans a considerable climatic gradient with an arid climate in the East and a mesic mediterranean climate in the West (García-Herrera *et al.*, 2001).

Taxa of the *Salsola divaricata* agg. are salt tolerant, perennial shrubs with terete succulent leaves and morphologically difficult to distinguish (Padrón Mederos, 2012). They all have a Kranz-like salsoloid leaf anatomy (Voznesenskaya *et al.*, 2013; Schüssler *et al.*, 2017). *Salsola divaricata* was categorized as a C<sub>2</sub> type I which is characterized by the photorespiratory CO<sub>2</sub> pump through GDC being confined to the bundle sheath cells while having C<sub>3</sub>-like activity of C<sub>4</sub> enzymes (e.g. PEPC and NADP-ME). Their CO<sub>2</sub> compensation points around 30 μmol mol<sup>-1</sup> are intermediate to C<sub>3</sub> and C<sub>4</sub> species (Schüssler *et al.*, 2017). The *Salsola divaricata* agg. belongs to Salsoleae, a tribe rich in C<sub>4</sub> species, but also with several C<sub>3</sub> species and a number of C<sub>3</sub>-C<sub>4</sub> species. The *Salsola divaricata* agg. forms a well-supported but unresolved subclade within a clade of C<sub>3</sub>-C<sub>4</sub> intermediate and C<sub>3</sub> species (Schüssler *et al.*, 2017).

The aim of this study was to find empirical evidence either for the model of C<sub>4</sub> evolution through C<sub>2</sub> as an intermediate pathway or for C<sub>2</sub> being the result of hybridization of a C<sub>3</sub> and C<sub>4</sub> parental lineage. We studied C<sub>4</sub> adaptive traits at the population level in the C<sub>2</sub> lineage *S. divaricata* agg. and searched for locally adapted more C<sub>4</sub>-like phenotypes. We also generated 991 gene trees from a transcriptome data set comprising C<sub>3</sub>, C<sub>4</sub> and C<sub>2</sub> species of the Salsoleae and explored incongruences to determine if a hybridization event is plausible in the lineage of the *S. divaricata* agg.

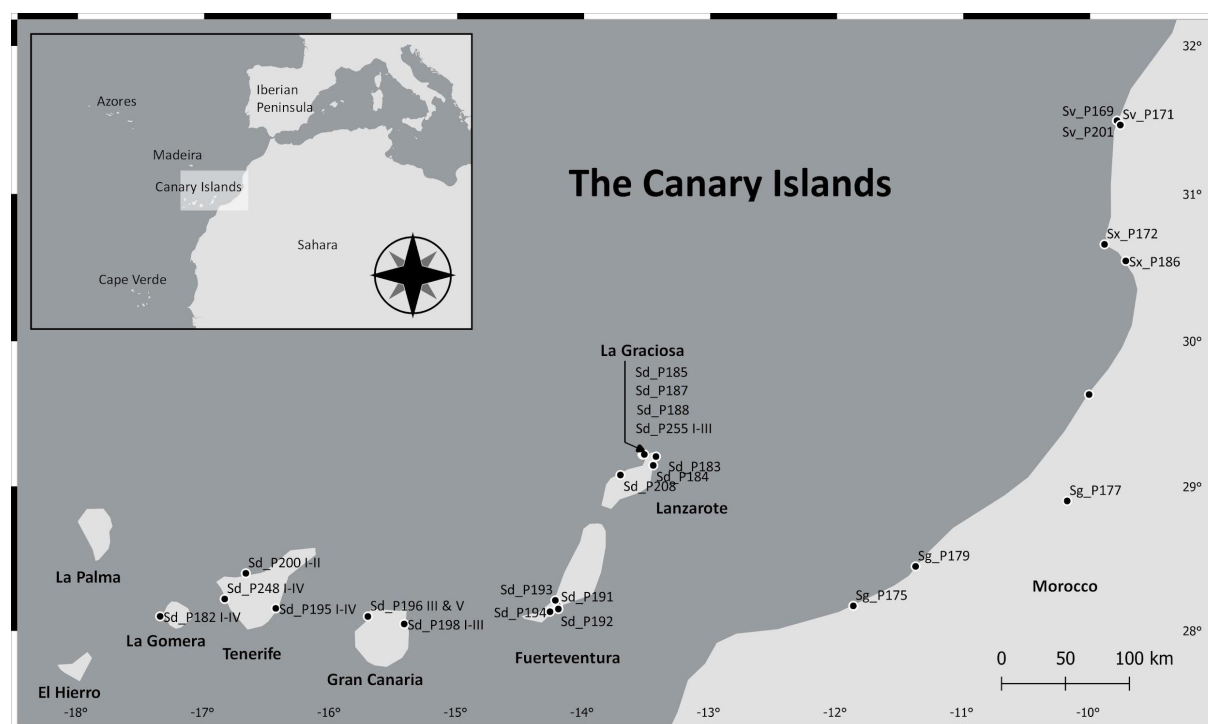

**Fig. 1:** Map of the collection locations of seeds and vouchers for the *S. divaricata* agg. (see also **Supporting Information Table S1** for voucher information). In total we analyzed 26 populations of the *S. divaricata* agg. on the Canary Islands and Morocco. Species name abbreviation and population number: Sd = *Salsola divaricata*, Sg = *S. gymnomaschala*, Sv = *S. verticillata*, Sx = *S. deschaseauxiana*; Pxxx = population number. Note: Morphological studies on the species complex (Brullo, 1982; Fennane and Ibn Tattou, 1998) consider *S. verticillata* and *S. deschaseauxiana* as conspecific, while *S. gymnomaschala* seems more similar to *S. divaricata* s.s.

## Materials and Methods

### Plant Material

Seeds and vouchers of 26 populations of the *S. divaricata* agg. were collected in 2013 and 2014 in the Canary Islands and Morocco (**Supporting Information Table S1**; **Fig. 1**) and grown in a greenhouse at the Botanical Garden Mainz with multiple individuals per population. Plants were grown in custom mixed soil. Day/night cycles of 14h/10h were artificially maintained with natural light and supplementary light with a total light intensity of 200–400  $\mu\text{mol m}^{-2} \text{s}^{-1}$ . The minimum temperature at night was 18 °C and daytime temperatures ranged between 25 to 35 °C in summer and 20 to 25 °C in winter. All plants were watered once a week in the winter and twice a week in the summer. The individuals included in the salt treatment were watered with 2% saltwater (20 g NaCl per liter; 34.3 mM) every two weeks from June 2015 until 2021. Individuals in the dry treatment were watered every two weeks from June 2015 to March 2017. The analyses of the photosynthesis traits began in 2016. **Supporting Information**

**Table S1** lists the populations included in this study as well as the collection and voucher information.

### **Carbon isotope measurements**

C<sub>3</sub> plants discriminate against fixing atmospheric <sup>13</sup>CO<sub>2</sub> by RuBisCO while C<sub>4</sub> plants do not discriminate via PEP carboxylase resulting in different isotope composition in plant biomass. Therefore, carbon isotope values (δ<sup>13</sup>C) can be used to detect C<sub>4</sub> cycle activity (Sage, 2016). We determined δ<sup>13</sup>C values between and within six populations of *S. divaricata* with six individuals per treatment (control, dry and salt). We also measured 30 samples collected from wild mother plants of 24 populations and compared them with the greenhouse cultivated offspring (165 individuals in total, all populations, including 36 in dry and 36 in salt treatment). To determine carbon isotope composition, a standard procedure with PDB (Pee Dee Belemnite) limestone as the carbon isotope standard was used (Bender *et al.*, 1973). The leaf samples were dried in silica gel, and then 1–2 mg were placed in a tin capsule and combusted in an EuroVector elemental analyser (EuroVector, Italy). After separating the resulting N<sub>2</sub> and CO<sub>2</sub> gases by gas chromatography, they were fed into the IsoPrime™ isotope ratio mass spectrometer (IRMS; GV Instruments Ltd. (Micromass Ltd.), United Kingdom) for determination of <sup>13</sup>C/<sup>12</sup>C ratios (R). δ<sup>13</sup>C values were determined according to δ<sup>13</sup>C(‰)=1000(R<sub>sample</sub>/R<sub>standard</sub>)<sup>-1</sup>, where R is <sup>13</sup>C/<sup>12</sup>C. The measurements were taken at Washington State University and at the Geology Department at the University of Mainz.

### **CO<sub>2</sub> compensation point measurements**

The CO<sub>2</sub> compensation point is a trait which is often used to identify C<sub>4</sub> species due to their very low values (usually less than 4 μmol CO<sub>2</sub> mol<sup>-1</sup>). We measured one to two individuals (1 to 3 technical replicates for each individual) of two to four populations per island of all species in the *S. divaricata* agg. (in total 53 individuals). Measurements were made on the unstressed group and four individuals in the dry and salt treatment. C<sub>3</sub> *S. webbia* (2x) and C<sub>4</sub> *S. oppositifolia* (3x) were measured for comparison. CO<sub>2</sub> compensation points were determined using the portable gas exchange measurement system GFS-3000 (Heinz Walz GmbH, Germany) with the standard measuring head 3010-S equipped with a standard leaf area cuvette and a LED-Array (for details see **Supporting Information Material & Methods S1**).

## PEPC activity measurements

Phosphoenolpyruvate carboxylase (PEPC) plays an important role in the C<sub>4</sub> pathway as it fixes atmospheric CO<sub>2</sub> after its conversion to HCO<sub>3</sub><sup>-</sup> by carbonic anhydrase into a four-carbon compound which gave this photosynthesis pathway its name (Reyna-Llorens & Hibberd, 2017). C<sub>4</sub> plants show high levels of PEPC activity compared to C<sub>3</sub> plants and an increased activity is seen as an important stage in evolving from an intermediate to a full C<sub>4</sub> photosynthesis pathway (Sage *et al.*, 2012). In total we sampled 14 populations of *S. divaricata* and six from the other three species (predominantly analyzing 5 to 7 individuals per population). Treatments were compared with 38 individuals in the control group, 23 in salt, and 17 in the dry treatment after quality check. PEPC activity measurements were conducted using the Tecan infinite M1000 (Tecan Trading AG, Männedorf, Switzerland) and a Greiner UV-Star 96-well plate (Sigma-Aldrich Chemie GmbH, Munich, Germany). For details of sample preparation see **Supporting Information Material & Methods S1**.

The assay of PEPC was initiated by adding leaf extract and 3.9 mM phosphoenolpyruvate (PEP). The chlorophyll content of the leaf extract was measured according to Wintermans and De Mots (1965) in 96% ethanol. PEPC activity (*a*) was calculated on the basis of the linear part of the progress curve as

$$a = SU[\mu\text{mol ml}^{-1} \text{ min}^{-1}]V_{\text{assay}}[\text{ml}]/(1000V_{\text{enzyme}}[\text{ml}]C_{\text{Chla+b}}[\text{mg ml}^{-1}]),$$

where SU is the substrate turnover, *V*<sub>assay</sub> is the total assay volume, *V*<sub>enzyme</sub> is the volume of the leaf extract and *C*<sub>Chla+b</sub> is the concentration of chlorophyll in the leaf extract. Statistical analyses were conducted in R v3.1.2 (R Core Team, 2014).

## Transcriptome processing and nuclear phylogenetic analyses

To evaluate the potential hybrid origin of the *S. divaricata* agg., we generated gene trees from a transcriptome dataset comprising C<sub>3</sub>, C<sub>4</sub> and C<sub>2</sub> species of Salsoleae; in total 13 transcriptomes representing 12 species. Three samples of these were newly sequenced on an Illumina HiSeq2500 platform at the University of Minnesota Genomics Center (paired-end 125 bp). For RNA extraction protocol and library preparation refer to Morales-Briones *et al.* (2021). Additionally, we sampled two species of Camphorosmeae and one of Caroxyloneae, and *Beta vulgaris* L. subf. Betoideae - Amaranthaceae as outgroups. **Table 1** lists all samples with their photosynthesis type, ploidy if known and SRA accession number. We followed Morales-Briones *et al.* (2021) for raw read processing, transcriptome assembly, transcript clustering, and homolog tree inference. We then applied the ‘monophyletic outgroup’



(MO) approach of Yang & Smith (2014) to prune orthologs that have all 17 taxa present. We used concatenation and coalescent-based methods for phylogenetic reconstruction. For the concatenation approach, we prepared a supermatrix by keeping only ortholog alignments with at least 300 bp and all 17 taxa. We estimated a maximum likelihood (ML) tree with RAxML v 8.2.11 (Stamatakis, 2014) using a partition by gene scheme. Clade support was assessed with 100 rapid bootstrap (BS) replicates. To estimate a species tree that is statistically consistent with the multi-species coalescent (MSC), Individual gene trees were used to infer a species tree using ASTRAL-III v.5.6.3 (Zhang *et al.*, 2018) using local posterior probabilities (LPP; Sayyari & Mirarab, 2016) to assess clade support. To examine nuclear gene tree discordance, we first calculated the Internode Certainty All score (ICA; Salichos *et al.*, 2014). Also, we calculated the number of conflicting and concordant bipartitions on each node of the species trees. We calculated both the ICA scores and the number of conflicting and concordant bipartitions with Phyparts (Smith *et al.*, 2015). Additionally, to distinguish strong conflict from weakly supported branches, we evaluated tree conflict and branch support with Quartet Sampling (QS; Pease *et al.*, 2018) using 1,000 replicates (for details see **Supporting Information Material & Methods S1**).

### Assessment of hybridization

In order to detect possible hybridization, first we inferred species networks under a maximum pseudo-likelihood (Yu & Nakhleh, 2015) approach using PhyloNet v.3.6.9. (Than *et al.*, 2008). To estimate the best number of hybridizations and test whether the species network fits our gene trees better than a strictly bifurcating tree, we performed model selection using the bias-corrected Akaike information criterion (Sugiura, 1978) and the Bayesian information criterion (Schwarz, 1978). We also used HyDe (Blischak *et al.*, 2018) to estimate the amount of admixture ( $\gamma$ ) in putative hybrid lineages. We tested all triples combinations and significance was assessed with a Bonferroni correction (for details see **Supporting Information Material & Methods S1**).

### Plastome assembly and phylogenetic analysis

To investigate phylogenetic signal from plastid sequences, *de novo* assemblies were carried out with the Fast-Plast v.1.2.6 pipeline (<https://github.com/mrmckain/Fast-Plast>) using the filtered organelle reads obtained from the transcriptome raw read processing. A ML tree was inferred with IQ-TREE v.1.6.1 (Nguyen *et al.*, 2015) using the automated model selection (Kalyaanamoorthy *et al.*, 2017) and 200 standard non-parametric BS replicates for branch



support (for details see **Supporting Information Material & Methods S1**). Additionally, we used QS with 1,000 replicates, to detect potential plastome conflict in the backbone as seen in other groups of Amaranthaceae s.l. (Morales-Briones *et al.*, 2021).

## Analysis of photosynthetic gene trees

We inferred trees for 50 genes that are important in photosynthesis to determine if the genes in *Salsola divaricata* agg. show a tendency to group with either a C<sub>3</sub> or a C<sub>4</sub> species. We downloaded coding and protein sequences from *Arabidopsis thaliana* as baits from the TAIR website (<https://www.arabidopsis.org/tools/bulk/sequences/index.jsp>). These loci were determined based on Lauterbach *et al.* (2017a,b) and included two RuBisCO subunit genes, four genes coding for proteins of the glyoxylate cycle, 17 genes encoding photorespiratory proteins, and 25 genes coding for C<sub>4</sub>-associated proteins (Lauterbach *et al.*, 2017b) as well as two C<sub>4</sub>-associated transcription factors (Lauterbach *et al.*, 2017a). Gene annotation and pathway assignment can be found in **Supporting Information Table S3**. We listed whether the *S. divaricata* agg. was either in a sister relationship with C<sub>3</sub> species *S. montana* or the C<sub>4</sub> clade. When there were several gene copies or weak bootstrap support, we additionally noted whether our group of interest was in a clade with the C<sub>3</sub> or the C<sub>4</sub> species (for details see **Supporting Information Material & Methods S1**).

## Results

### Carbon isotope measurements

*Salsola divaricata* plants growing in the wild on the Canary Islands generally had higher  $\delta^{13}\text{C}$  values (-21 to -28; mean -24.44) than those grown from seeds under greenhouse conditions (-22 to -34; mean -27.77). Overall, the  $\delta^{13}\text{C}$  values of the *S. divaricata* agg. show a broad range but not a single individual (stressed or not stressed) came close to a C<sub>4</sub>-like  $\delta^{13}\text{C}$  value of > -16 (**Fig. 2**). We compared  $\delta^{13}\text{C}$  values between control, dry and salt treatments within six populations (six individuals per treatment). The Shapiro-Wilk test was used to check for normality of distribution and the Levene's Test for homogeneity of variance. Excluding outlier 198IIr of population 198, all treatment groups of all populations were normally distributed. All populations had homogeneous variances except population 188. Since not all assumptions for an ANOVA test were met we chose the Kruskal-Wallis rank sum test to compare treatments within and between populations. In the control there was no significant difference of  $\delta^{13}\text{C}$  values among populations (Kruskal-Wallis chi-squared = 5.1081, df = 5, p-value = 0.40) and the same was found for the drought treatment (Kruskal-Wallis chi-squared = 8.61, df = 5, p-

value = 0.13). In the salt treatment there was a significant difference of  $\delta^{13}\text{C}$  values among populations (Kruskal-Wallis chi-squared = 15.47, df = 5, p-value = 0.009), which was due to significantly higher  $\delta^{13}\text{C}$  values in salt treated individuals of populations 191 compared to 182 and 194. We tested for differences of carbon isotope values between treatments within populations of the *Salsola divaricata* agg. and found that there was a significant difference for populations 182 (Kruskal-Wallis chi-squared = 7.94, df = 2, p-value = 0.019), 191 (Kruskal-Wallis chi-squared = 10.84, df = 2, p-value = 0.004), and 198 (Kruskal-Wallis chi-squared = 8.84, df = 2, p-value = 0.012). However, there was no significant difference among the three treatments for populations 184 (Kruskal-Wallis chi-squared = 2.33, df = 2, p-value = 0.31), 188 (Kruskal-Wallis chi-squared = 0.78, df = 2, p-value = 0.68), and 194 (Kruskal-Wallis chi-squared = 2.27, df = 2, p-value = 0.32) (**Fig. 3**). After grouping  $\delta^{13}\text{C}$  values according to island, significant differences were found among islands (ANOVA: df = 6, F value = 4.08, p-value = 0.001) due to differences between La Gomera and the mainland (SW Morocco), as well as between Lanzarote resp. Tenerife and the mainland. All other differences were not statistically significant. We found that the populations of *S. verticillata*, *S. deschaseauxiana* and *S. gymnomaschala* on the Moroccan mainland often had higher  $\delta^{13}\text{C}$  values than the populations of *S. divaricata* on the Canary Islands (the non-stressed control groups that are regularly watered, **Supporting Information Fig. S1**). However, due to very different sample sizes further statistical tests including all populations were inconclusive.

Overall, these results show a broad plasticity of  $\delta^{13}\text{C}$  values among populations associated with source population and growth conditions well within the range typical of  $\text{C}_3$  species. The significantly higher  $\delta^{13}\text{C}$  values of salt treated individuals indicate that salinity rather than drought affects the  $\delta^{13}\text{C}$  in *Salsola divaricata* agg. and could be responsible for the occasional observation of relatively high  $\delta^{13}\text{C}$  values of our samples collected in the wild close to the shoreline.

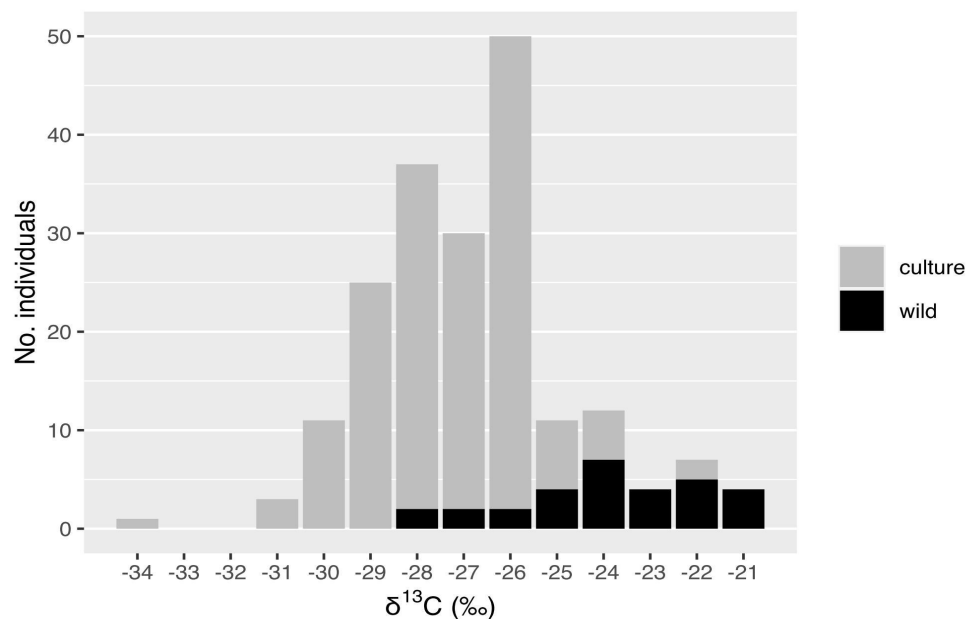

**Fig. 2:** Distribution of  $\delta^{13}\text{C}$  (‰) of 195 samples of the *Salsola divaricata* agg., of these 30 were collected from plants growing in the wild and 165 from plants in cultivation at the Botanical Garden Mainz. This includes 36 individuals in dry treatment and 36 in salt treatment, all others are in the control group. See Table S1 for information on populations included.

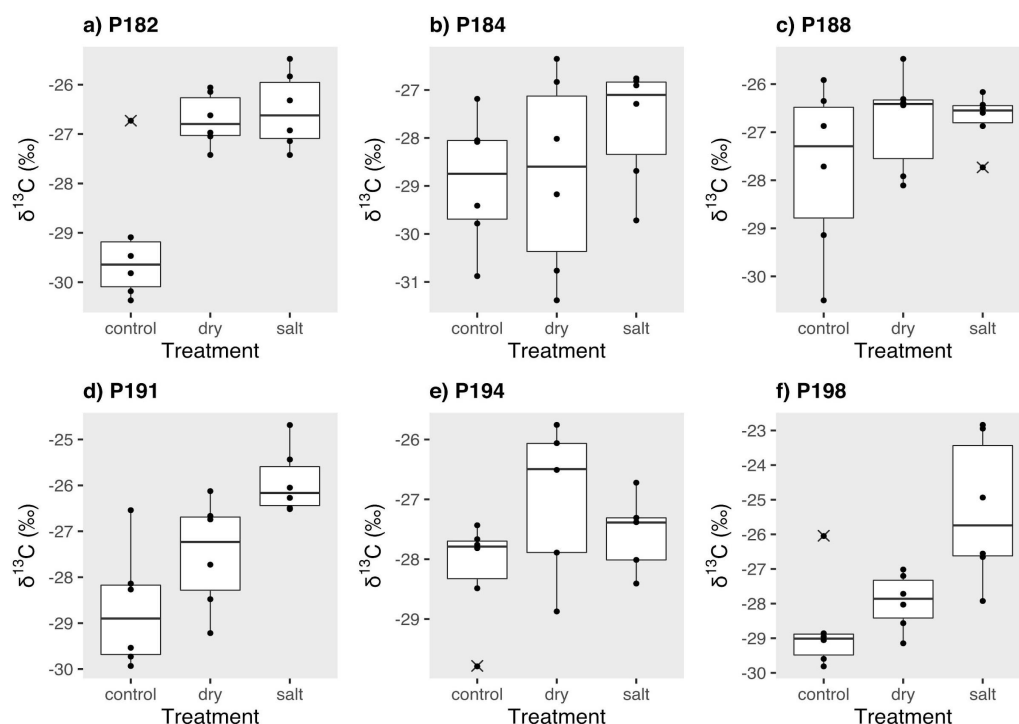

**Fig. 3:** Comparison of carbon isotope values ( $\delta^{13}\text{C}$ (‰)) between treatments within populations (P) of the *Salsola divaricata* agg. Significant differences were found for populations 182 from La Gomera (a; Kruskal-Wallis chi-squared = 7.94, df = 2, p-value = 0.02), 191 from Fuerteventura (d; Kruskal-Wallis chi-squared = 10.84, df = 2, p-value = 0.004), and 198 from Gran Canaria (f; Kruskal-Wallis chi-squared = 8.84, df = 2, p-value = 0.01). No significant differences were found between the three treatments for 184 from Lanzarote (b; Kruskal-Wallis chi-squared = 2.33, df = 2, p-value = 0.31), 188 from La Graciosa (c; Kruskal-Wallis chi-squared = 0.78, df = 2, p-value = 0.68), and 194 from Fuerteventura (e; Kruskal-Wallis chi-squared = 2.27, df = 2, p-value = 0.32).

## CO<sub>2</sub> compensation point measurements

The CO<sub>2</sub> compensation points of the four species of the *Salsola divaricata* agg. lie between those of the C<sub>3</sub> (*Salsola webbii*) and C<sub>4</sub> species (*Salsola oppositifolia*) as expected (between 20 and 30  $\mu\text{mol CO}_2 \text{ mol}^{-1}$ , **Fig. 4a**). With 19.56 and 21.22  $\mu\text{mol CO}_2 \text{ mol}^{-1}$ , respectively, the mean values of *S. deschaseauxiana* and *S. verticillata* were slightly lower than those of *S. divaricata* and *S. gymnomaschala* (25.14 and 26.75  $\mu\text{mol CO}_2 \text{ mol}^{-1}$  respectively). When looking at individual measurements we again observed a broad range from 17 to 40  $\mu\text{mol CO}_2 \text{ mol}^{-1}$  with one outlier at 9  $\mu\text{mol CO}_2 \text{ mol}^{-1}$  (**Supporting Information Fig. S2**). Populations growing on the more arid Islands such as Lanzarote and Fuerteventura or in Morocco did not show lower CO<sub>2</sub> compensation points. Due to varying values within each population (**Supporting Information Fig. S2**) and the relatively small sample sizes (one to two individuals per population) we did not conduct further statistical analysis.

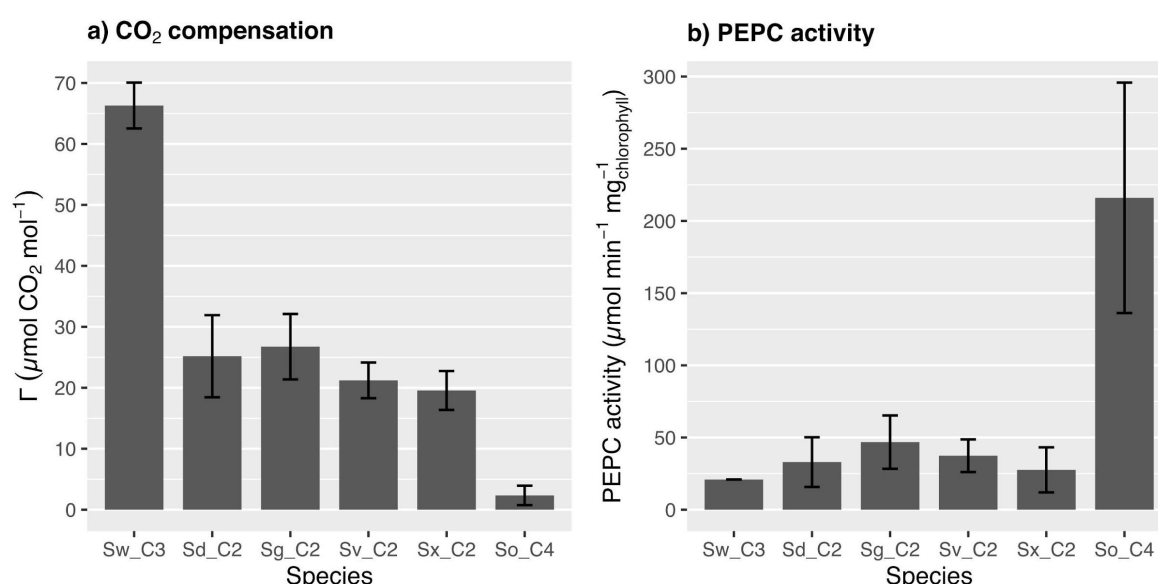

**Fig. 4: a)** CO<sub>2</sub> compensation points (Γ in  $\mu\text{mol CO}_2 \text{ mol}^{-1}$ ) of the separate species of the C<sub>2</sub> *Salsola divaricata* agg. (Sd\_C2 = *Salsola divaricata*, Sg\_C2 = *S. gymnomaschala*, Sv\_C2 = *S. verticillata*, Sx\_C2 = *S. deschaseauxiana*) compared to the values of C<sub>3</sub> species *Salsola webbii* (Sw\_C3) and C<sub>4</sub> species *Salsola oppositifolia* (So\_C4). **b)** PEPC activity [ $\mu\text{mol min}^{-1} \text{ mg}^{-1}_{\text{chlorophyll}}$ ] of the separate species of the C<sub>2</sub> *Salsola divaricata* agg. compared to C<sub>4</sub> *S. oppositifolia* and C<sub>3</sub> *S. webbii*.

## PEPC activity measurements

First, we compared the PEPC activity of the separate species of the *Salsola divaricata* agg. to the values of the closely related C<sub>3</sub> species *Salsola webbii* and C<sub>4</sub> species *Salsola oppositifolia*. C<sub>3</sub> (n=1, 30  $\mu\text{mol min}^{-1} \text{ mg}^{-1}_{\text{Chlorophyll}}$ ) and C<sub>4</sub> values (n=2, mean 216  $\mu\text{mol min}^{-1} \text{ mg}^{-1}_{\text{Chlorophyll}}$ ) were as expected clearly distinguishable (**Fig. 4b**). The values of the C<sub>2</sub> species were closer to

those of the C<sub>3</sub> species and much lower than the C<sub>4</sub> species (*Salsola divaricata*, n=82, mean activity 33  $\mu\text{mol min}^{-1} \text{mg}_{\text{Chlorophyll}}^{-1}$ ; *S. gymnomaschala*, n=10, mean 46.8  $\mu\text{mol min}^{-1} \text{mg}_{\text{Chlorophyll}}^{-1}$ ; *S. verticillata*, n=7, mean 37.4  $\mu\text{mol min}^{-1} \text{mg}_{\text{Chlorophyll}}^{-1}$ ; *S. deschaseauxiana*, n=6, mean 27.6  $\mu\text{mol min}^{-1} \text{mg}_{\text{Chlorophyll}}^{-1}$ ; **Fig. 4b**). We used a Kruskal-Wallis test to determine if statistically significant differences exist between C<sub>2</sub> species (Kruskal-Wallis chi-squared = 9.94, df = 3, p-value = 0.019). This significant difference was observed due to the values of *S. divaricata* on the Canary Islands having a median of 30.05  $\mu\text{mol min}^{-1} \text{mg}_{\text{Chlorophyll}}^{-1}$  and *S. gymnomaschala* in Morocco having a median of 48.32  $\mu\text{mol min}^{-1} \text{mg}_{\text{Chlorophyll}}^{-1}$ . Due to the high level of variation within species we took a closer look at 14 populations of *S. divaricata* and observed a significant difference between them (Kruskal-Wallis chi-squared = 34.64, df = 13, p-value = 0.001, see also **Fig. 5a**). When grouped according to island, we found a significant difference (Kruskal-Wallis chi-squared = 22.199, df = 5, p-value = 0.0005) which is due to the difference in values between populations on Gran Canaria and Lanzarote, as well as populations on La Graciosa and Fuerteventura and on La Graciosa and Gran Canaria (**Fig. 5b**). We did not find a significant difference between treatments in the greenhouse in *S. divaricata* (Kruskal-Wallis chi-squared = 1.21, df = 2, p-value = 0.55). Again, we observe a high variation of PEPC activity values within populations and islands.

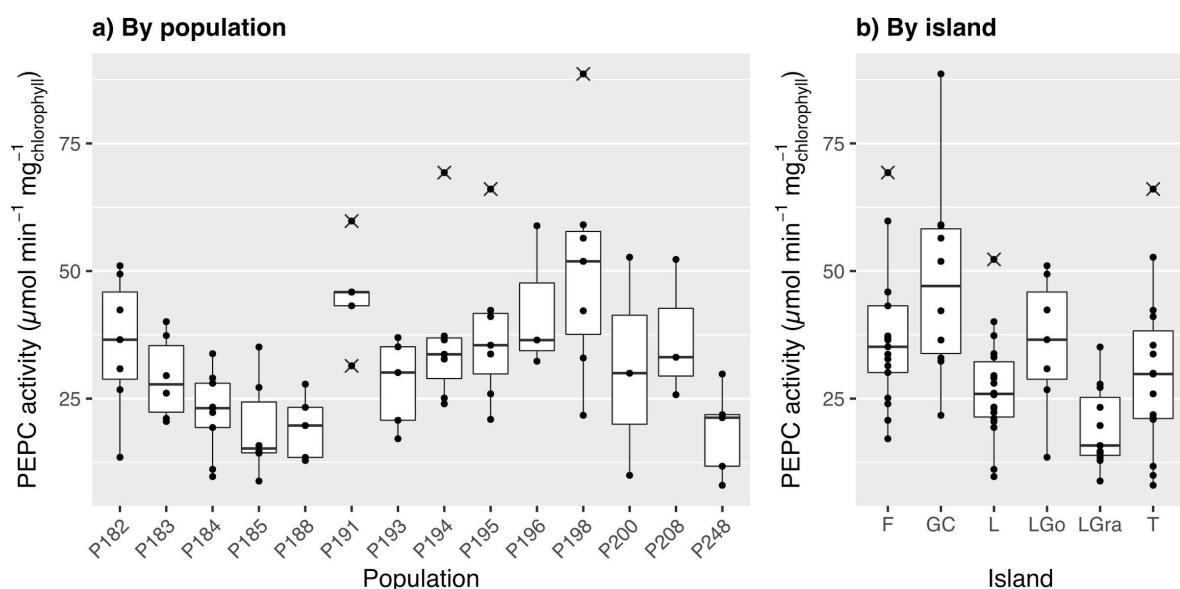

**Fig. 5:** Boxplots of PEPC activity [ $\mu\text{mol min}^{-1} \text{mg}_{\text{Chlorophyll}}^{-1}$ ] of *Salsola divaricata* Moq. **a)** Values grouped by population (P). **b)** Values grouped by island; F = Fuerteventura, GC = Gran Canaria, L = Lanzarote, LGo = La Gomera, LGra = La Graciosa, T = Tenerife.

## Phylogenomic analyses

The raw reads for the newly generated transcriptomes are available from the NCBI Sequence Read Archive (**Table 2**). We obtained 991 final MO orthologs that included all 17 taxa with alignments of lengths between 315 and 6621 bp. The concatenated matrix comprises 1,427,449 aligned columns with overall matrix occupancy of 86% (see **Supporting Information Table S2** alignment occupancy per taxon).

The ASTRAL species tree and the concatenated RAxML tree (**Supporting Information Fig. S3**) had similar topologies with most nodes receiving the maximum support (BS = 100%; LPP = 1). *Caroxylon vermiculatum* was recovered as sister to all other Salsoleae, followed by a grade formed by *Salsola webbii*, *Salsola genistoides*, *Kali collina*, and *Salsola montana*. *Salsola divaricata* and *Salsola verticillata* form a clade placed as sister of the clade composed of *Anabasis articulata*, *Salsola soda*, *Salsola oppositifolia*, *Halogeton*, *Hammada*, and *Holoxylon*. The only difference between the two topologies is that *Anabasis articulata* and *Salsola soda* were sisters with maximum support in the RAxML tree but formed a grade with lower support (LPP = 0.74) in the ASTRAL tree.

Concordance analyses (**Supporting Information Fig. S3 and S4**) overall showed high support for the monophyly of Salsoleae and the *Salsola divaricata* agg., while signaling conflict for the remaining taxa. The placement of *Salsola genistoides* had low support with only 261 out of 794 informative gene trees being concordant (ICA = -0.45) and high QS score (0.22/0/0.98) but also suggesting an alternative topology. The clade composed of *Salsola divaricata* + *Salsola verticillata* had strong support with 808 out of 913 gene trees being concordant (ICA = 0.71) and maximum QS support (1/-/1; i.e., all sampled quartets supported that branch). However, the two samples of *Salsola divaricata* showed signals of alternative topologies with only 332 out of 900 gene trees supporting their sister relationship (ICA = 0.56) and QS counter support (-0.25/0/1). The sister relationship of *Salsola divaricata* + *S. verticillata* and the remaining Salsoleae had low support with only 178 out of 705 gene trees being concordant (ICA = 0.29) and also low QS support (0.085/0/1 [ASTRAL]; (0.11/0/1) [RAxML]) suggesting an alternative topology. The placement of *Anabasis articulata* and *Salsola soda*, which varied between RAxML and ASTRAL trees, also had low gene tree and QS support with signals of alternative topologies. The clade composed of *Salsola oppositifolia*, *Halogeton*, *Hammada*, and *Holoxylon* was supported only by 280 out of 692 gene trees (ICA = 0.24), but had maximum QS support,



while within the clade all relationships have low gene tree and QS support signaling alternative topologies.

The final plastid alignment had 80,903 characters with a matrix occupancy of 70%. The plastid tree largely differed from the nuclear topologies and had most nodes with maximum support (BS = 100; **Fig. 6** and **S5**). *Caroxylon vermiculatum*, *Kali collina*, and *Salsola genistoides* form a well supported clade (BS = 100; QS = 0.56/0/1) that is sister to all Salsoleae. *Salsola webbii* and *Anabasis articulata* form a grade with strong support (BS = 100; QS = 0.6/0/0.99 [*S. webbii*]; QS = 1/-/1 [*A. articulata*]). The remaining species form an unsupported clade (BS = 0.47; QS = -0.0096/0.88/0.68) composed of two subclades. The first subclade (BS = 93; QS = 0.19/0.91/0.78) is composed of *Salsola verticillata* + *Salsola montana* (BS = 100; QS = 0.61/0/1) and the two samples of *Salsola divaricata* (BS = 100; QS = 1/-/0.77). The second subclade (BS = 100; QS = 0.59/0/0.95) has *Salsola soda* as the sister the clade (BS = 100; QS = 1/-/1) composed of *Salsola oppositifolia*, *Halogeton*, *Hammada*, and *Haloxyton*.

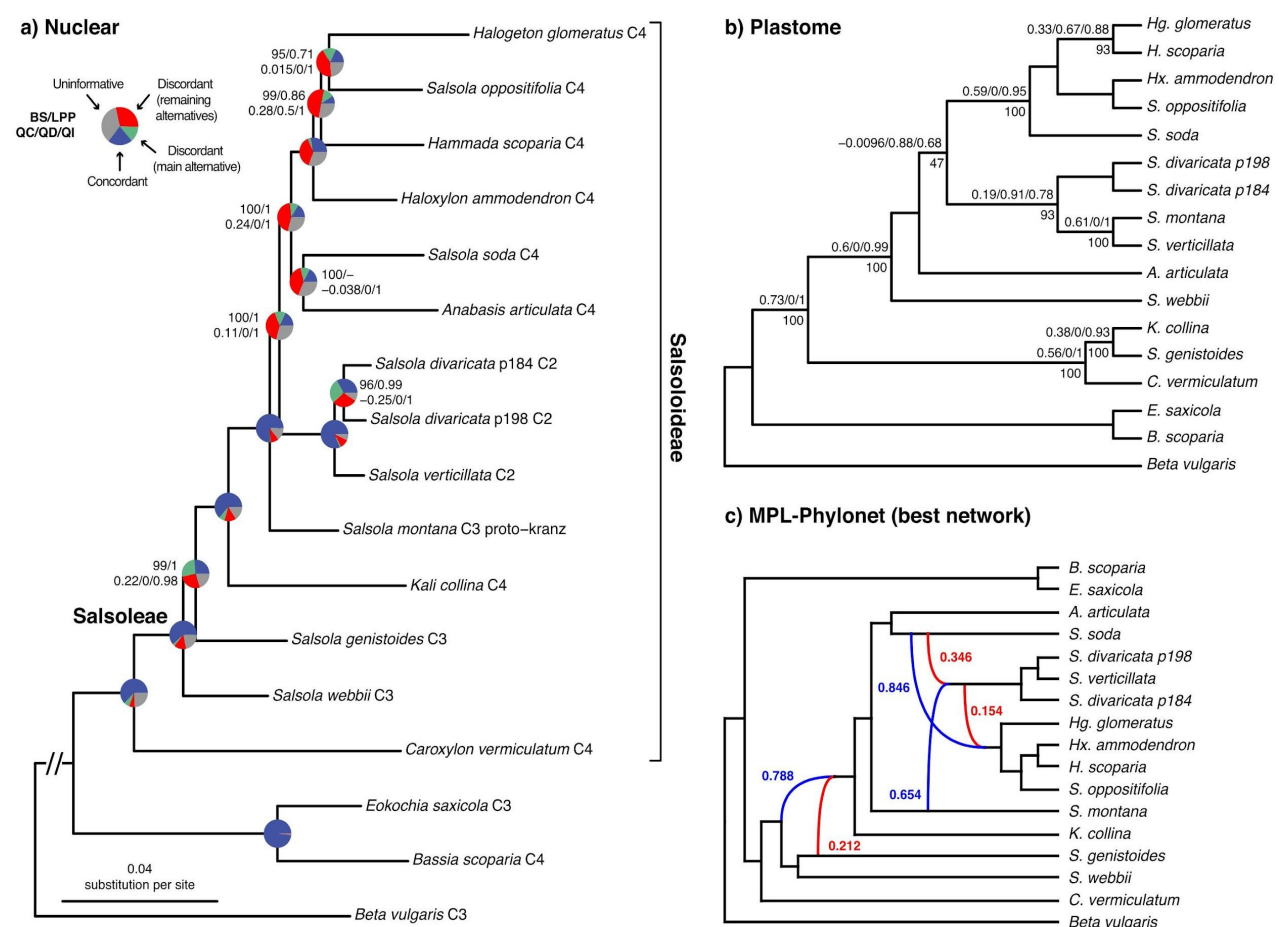

**Fig. 6:** a) Maximum likelihood phylogeny of Salsoloideae inferred from the RAxML analysis of the concatenated 991-nuclear gene supermatrix from the 'monophyletic outgroup' (MO) orthologs. Bootstrap support and local posterior probabilities (BS/LPP) are shown above branches. Nodes with full support (BS =



100/LPP = 1) are not shown. Em dashes (—) denote alternative topology compared to the ASTRAL tree (Supporting Information Fig. S3). Quartet Sampling (QS) scores are shown below branches. QS score: Quartet concordance (QC)/Quartet differential (QD)/Quartet informativeness (QI). Full QS support (1/–/1) not shown. Pie charts represent the proportion of gene trees that support that clade (blue), the proportion that support the main alternative bifurcation (green), the proportion that support the remaining alternatives (red), and the proportion (conflict or support) that have < 50% bootstrap support (gray). Branch lengths are proportional to the number of substitutions per site (scale bar on the bottom). b) Cladogram of Salsoloideae inferred from IQ-TREE analysis of concatenated complete and partial plastomes. QS scores and BS support are shown above and below branches, respectively. See Supporting Information Fig. S5 for phylogram. c) Best maximum pseudo-likelihood species network inferred with PhyloNet. Red and blue curved branches indicate the minor and major edges, respectively of hybrid nodes. Numbers next to curved branches indicate inheritance probabilities for each hybrid node.

## Assessment of hybridization

The model selection showed that a network was always a better model than a bifurcating tree (Table 3). A network with three hybridization events is the best model (AICc=37875.93) compared to all others, including the best bifurcating model (RAxML; AICc=39547.83). The best network had three reticulation events (Fig. 6c). First, the *Salsola divaricata* and *Salsola verticillata* clade was a product of a hybridization event between *Salsola soda* (C<sub>4</sub>) (inheritance probability  $p_i = 0.346$ ) and *Salsola montana* (C<sub>3</sub>) ( $p_i = 0.654$ ). The second reticulation event showed that the clade formed by *Salsola oppositifolia*, *Halogeton*, *Hammada*, and *Haloxylon* (all C<sub>4</sub>) is the product of a hybridization event between *Salsola soda* (C<sub>4</sub>) ( $p_i = 0.846$ ) and the ancestor lineage of *Salsola divaricata* + *Salsola verticillata* (C<sub>2</sub>) ( $p_i = 0.154$ ). These two clades were also recovered as hybrids in the other networks with one, two and three reticulation events with similar parental lineages and inheritance probabilities (Supporting Information Fig S6). The third event is a deeper reticulation within *Salsoleae* which showed that most species of the group (excluding *Caroxylon*) were a product of an ancient hybridization event between *Salsola genistoides* ( $p_i = 0.212$ ) and the sister lineage of *Salsola genistoides* + *Salsola webbii* ( $p_i = 0.788$ ). The HyDe analysis of all possible triples at the individual level resulted in 1,680 hybridization tests, of which 298 triples were significant. The significant triples showed that 12 out of 13 individuals of *Salsoleae* are involved in multiple hybridization events, which is mostly in agreement with the nested reticulation events detected with Phylonet. The admixture parameter ( $\gamma$ ) ranged from 0.013 to 0.986 (average 0.458). These results indicate frequent hybridization within *Salsoleae*. Additionally, Hyde also identified *Eokochia saxicola* as a hybrid (Supporting Information Table S3, Fig. S7).

## Individual analysis of genes or gene families involved in photosynthesis or photorespiration

The number of sequences in the 50 alignments ranged from 7 to 65 due to variation in the number of accessions and gene copies (**Supporting Information Table S3**). Sequence lengths ranged from an average minimum of 420 (255 to 867) to an average maximum of 1,467 bp (462 to 3,126) with an average length of 1,168 in all sequences. Summarizing all genes, *Salsola divaricata* agg. appeared 22 times as sister to C<sub>3</sub> *S. montana* and 26 times as sister to the C<sub>4</sub> clade regardless of bootstrap support (**Supporting Information Table S3**). In three alignments *S. divaricata* agg. was missing. When multiple copies per gene were recovered for *S. divaricata* agg, they were often non-monophyletic, but instead separated in clades with copies from the C<sub>3</sub> and/or C<sub>4</sub> species. In these cases, sequences of the *S. divaricata* agg. appeared 21 times with C<sub>3</sub> and 26 times with C<sub>4</sub> species. Separated by pathway assignment, the *S. divaricata* agg. was 16 times sister to C<sub>3</sub> (11 times in clade with C<sub>3</sub>) and 15 times sister to C<sub>4</sub> (17 times in clade with C<sub>4</sub>) for C<sub>4</sub> genes (independent from bootstrap support). When incorporating bootstrap support and discarding everything below 70, the numbers shrink to 10 times sister to C<sub>3</sub> (8 times in clade with C<sub>3</sub>) and 10 times sister to C<sub>4</sub> (13 times in clade with C<sub>4</sub>) for C<sub>4</sub> genes. For the two C<sub>4</sub>-associated transcription factors, a sister relationship of *S. divaricata* agg. to the C<sub>4</sub> clade is supported for SHORTROOT (BS = 86). The sister relationship to the C<sub>4</sub> clade is not well supported for BEL1-like homeodomain 7 (BS =17 sister to C<sub>4</sub>, 57 in clade with C<sub>4</sub>). For the genes assigned to the Glyoxylate cycle *S. divaricata* agg. appears with several copies which are grouped with high support with either C<sub>3</sub> or C<sub>4</sub> (BS > 80). One locus is missing in the *S. divaricata* agg. and *S. montana*. *Salsola divaricata* agg. is also missing in the alignments for the RuBisCO subunits. In the trees for photorespiration-associated genes many species are represented with several copies, even though during the transcriptome processing putative genes were inferred to remove isoforms and assembly artifacts (i.e. misassemblies and chimeras). This is also true for *S. divaricata* agg. which is also rarely monophyletic. The sister relations of *S. divaricata* agg. to the C<sub>3</sub> species are not well supported (5 times with BS < 70), but clade memberships with the C<sub>3</sub> species are (9 times, BS > 70). Sister relations to the C<sub>4</sub> clade are well supported in six of the nine times this occurred, with supported shared clade membership in seven of ten cases. Just like the *S. divaricata* agg. the C<sub>4</sub> clade is also not monophyletic in most cases. Clade assignment for all 50 genes is listed in **Supporting Information Table S3** and the individual trees are shown in the **Supporting Information Fig S8**.

## Discussion

In this study we aim to distinguish two alternative hypotheses concerning the origin of C<sub>3</sub>-C<sub>4</sub> intermediacy of the *Salsola divaricata* agg. The model of C<sub>4</sub> evolution (e.g., Sage, 2004) interprets C<sub>2</sub> as an evolutionary stepping stone to fully functional C<sub>4</sub> photosynthesis. *Salsola divaricata* is currently classified as a C<sub>2</sub> Type I according to Sage *et al.* (2014). A strong selective pressure towards an increase of PEPC activity should be expected under more stressful (more carbon deficient) conditions in the more arid part of the distribution area (Lanzarote, Fuerteventura, Morocco) and a transition to the C<sub>2</sub> Type II or even C<sub>4</sub>-like intermediate type, resulting in a reduction of photorespiration (Sage *et al.*, 2014). In case of a hybrid origin of C<sub>2</sub> in the *Salsola divaricata* agg. caused by a hybridization event at some point in the evolutionary history of the Salsoleae, which is the alternative working hypothesis, we should see an independent segregation of C<sub>4</sub>-traits (Brown & Bouton, 1993; Oakley *et al.*, 2014); and, a phylogenetic signal indicating a hybridization event involving the *Salsola divaricata* lineage.

#### **Carbon isotope measurements depict a stress reaction in the *S. divaricata* agg.; but without occurrence of a more C<sub>4</sub>-like photosynthesis in populations growing in drier environments**

Although samples collected in the wild had slightly higher  $\delta^{13}\text{C}$  values than those sampled in our greenhouse (stressed or control), there is still a clear difference to typical values of C<sub>4</sub> species. None of the samples showed a  $\delta^{13}\text{C}$  value typical for a C<sub>4</sub>-like or a C<sub>4</sub> plant which would be around -9 to -16 ‰ (Sage, 2016); instead all samples had values falling within the range typical for C<sub>3</sub> species which would be around -22 to -32 ‰ (Sage, 2016). In C<sub>3</sub> plants the  $\delta^{13}\text{C}$  values of leaves depend on a number of factors including stomatal conductance and capacity to capture CO<sub>2</sub> in photosynthesis which is dependent on light intensity, growth temperature, photochemistry and capacity for carbon assimilation. The plants growing in the greenhouse are under less stress for potential water loss than field conditions due to lower light intensity, and temperature being more moderate than some field conditions. The results suggest a greater stomatal limitation on photosynthesis in the field grown plants, which results in a low intercellular CO<sub>2</sub> concentration. This will change the discrimination against the heavier C isotope since RuBisCO will capture more <sup>13</sup>CO<sub>2</sub> resulting in slightly higher  $\delta^{13}\text{C}$  values (von Caemmerer, 1992).

We observed a broad plasticity of  $\delta^{13}\text{C}$  values. Populations on the Moroccan mainland often have higher values than the populations on the Canary Islands; but there are many exceptions

in populations on the more arid Islands of Fuerteventura and La Graciosa as well as on the more humid Islands of Gran Canaria, Tenerife and La Gomera. There does not seem to be a clear pattern correlated with the general climatic conditions on the Islands. Therefore, we assume that the observed variation is due to local, microclimatic differences. In any case, there are no indications of populations exhibiting C<sub>4</sub>-like photosynthesis on the basis of the  $\delta^{13}\text{C}$  values. *Salsola divaricata* plants from all populations grown for several years under salt stress in the greenhouse showed clear morphological differences in comparison to the control plants. They had more succulent leaves, did not grow to the same height as their counterparts in the control group and most individuals in the salt group flowered earlier. In three of the six tested populations, La Gomera (182), Fuerteventura (191), and Gran Canaria (198), this long-term salt stress was reflected in a significantly higher  $\delta^{13}\text{C}$  value. The three other populations from Lanzarote, La Graciosa and Fuerteventura had slightly, but not significantly higher, values for the salt treatment compared to the control group. This suggests *Salsola divaricata* can adapt to salt stress by increasing water storage and decreasing stomatal conductance and it explains some of the  $\delta^{13}\text{C}$  value variation found in the wild as salinity certainly varies among sites.

#### **C<sub>3</sub>-C<sub>4</sub> intermediate CO<sub>2</sub> compensation points for *S. divaricata* agg. supports a stable C<sub>2</sub>-state with high plasticity**

The CO<sub>2</sub> compensation points of the *S. divaricata* agg. are well within the range of other C<sub>2</sub> species (Sage *et al.*, 2014 and ref. therein) and they are significantly lower than the values of C<sub>3</sub> species *S. webbii* and significantly higher than those of C<sub>4</sub> species *S. oppositifolia*. There is no evidence for constantly lower  $\Gamma$  values in populations that originated from more arid regions, although individuals of *S. verticillata* and *S. deschaseauxiana* mostly show somewhat lower values, many individuals from similar climatic environments (e.g. *S. gymnomaschala* or individuals of *S. divaricata* from Fuerteventura or Lanzarote) show higher values which screws a possible relation of climate and lower  $\Gamma$  values. Sage *et al.* (2014) outlined that a  $\Gamma$  value below 10  $\mu\text{mol CO}_2 \text{ mol}^{-1}$  characterizes the transition from C<sub>2</sub> Type I to C<sub>2</sub> Type II and represents an evolutionary progression towards C<sub>4</sub>. An accessory C<sub>4</sub> metabolic cycle is present in C<sub>2</sub> Type II plants and was so far only observed in several species of *Flaveria* and *Mollugo verticillata* (Edwards & Ku, 1987). None of the  $\Gamma$  measurements of 53 individuals of the *Salsola divaricata* agg. shows an indication of an accessory C<sub>4</sub> metabolic cycle and a significantly higher carboxylation by PEPC.

So far the analysed traits seem to be independent between populations and islands and show a high plasticity. On Lanzarote for example, populations of *S. divaricata* have comparably high  $\Gamma$  values and medium to low carbon isotope values compared to other populations.

**PEPC activity does not relate to  $\Gamma$  values or carbon isotope values in *S. divaricata* agg.**

The PEPC activity of the *S. divaricata* agg. is similar to the C<sub>3</sub> species *S. webbii*. Even though there was a high standard deviation within C<sub>4</sub> *S. oppositifolia*, it is evident that none of the C<sub>2</sub> individuals comes even close to a C<sub>4</sub>-like value. The activity of PEPC for *S. verticillata* and *S. deschaseauxiana* are slightly lower than those for *S. divaricata*; therefore, their slightly lower  $\Gamma$  values and slightly higher carbon isotope values are not due to increased CO<sub>2</sub> fixation by an optimized PEPC. Thus, *S. verticillata* and *S. deschaseauxiana* do not seem to be closer to a more C<sub>4</sub>-like state than *S. divaricata* or *S. gymnomaschala*.

The PEPC activity in the *S. divaricata* agg. is highly variable and shows a lack of correlation with carbon isotope values and CO<sub>2</sub> compensation points, as discussed above for *S. verticillata*. We would expect a higher PEPC activity in the salt treatment or the more arid locations e.g. Lanzarote or Fuerteventura, however that was not the case. Although there are statistically significant differences between islands, it is not possible to predict a value for PEPC activity given the location since there is generally a large overlap of values. The differences between populations could not be explained by the climatic context of the parent plant in the wild and they were all treated the same in the greenhouse. We could not detect a correlation between PEPC activity and the previously discussed traits, supporting the independent distribution of the traits.

The independent variation in three photosynthetic traits (carbon isotope value, CO<sub>2</sub> compensation point and PEPC activity) does not support a directed selection towards C<sub>2</sub> Type II or C<sub>4</sub>-like photosynthesis in any of the populations studied, not even those growing in semi-desert conditions. In contrast, our trait observations are more in line with the results of hybridization experiments (Brown & Bouton, 1993; Oakley *et al.*, 2014; Kadereit *et al.*, 2017) which supports the hypothesis of a hybrid origin of the *Salsola divaricata* agg. Summarizing the physiology of advanced generations of interspecific C<sub>3</sub> and C<sub>4</sub> hybrids, Brown & Bouton (1993) stated that the 'correlation among photosynthetic traits were low' which indicates 'a high degree of independence, both genetic and physiological, among C<sub>4</sub> traits'. Like in our study, the hybridization experiment of C<sub>3</sub> and C<sub>4</sub> *Atriplex* (Oakley *et al.*, 2014) showed a broad range of  $\Gamma$  values (in nine F<sub>2</sub> individuals from 25-45  $\mu\text{mol CO}_2 \text{ mol}^{-1}$ ; and one C<sub>4</sub>-like value).



Brown & Bouton (1993) hypothesize that some of the photosynthetic traits measured can be more C<sub>4</sub>-like due to non-disturbance of the C<sub>3</sub> metabolism, such as  $\Gamma$ , while others mirror the physiological C<sub>3</sub> default condition, such as enzyme activity.

# **First phylogenomic evidence of a hybrid origin of the *S. divaricata* agg.**

The Salsoleae species tree shows a high level of conflict including the *S. divaricata* agg, despite high bootstrap support. The assessment of hybridization events using PhyloNet and HyDe showed multiple hybridization events within Salsoleae in which the *Salsola divaricata* agg. was likely involved. The incomplete sampling of Salsoleae does not allow us to identify the exact parental lineages; but a hybrid origin of the *Salsola divaricata* agg. was highly supported. The network that was recovered most often shows a possible ancient hybridization event involving an ancestor of C<sub>4</sub> *Salsola soda* and the C<sub>3</sub> proto-kranz *Salsola montana* giving rise to the *Salsola divaricata* agg. clade. This is the first genomic evidence that a C<sub>3</sub>-C<sub>4</sub> intermediate species is the result of (ancient) hybridization between a C<sub>4</sub> and a C<sub>3</sub> lineage. The second reticulation event at a later time indicates a possible hybridization event involving the ancestor of *Salsola divaricata* + *Salsola verticillata* and the C<sub>4</sub> *Salsola soda* giving rise to the C<sub>4</sub> clade formed by *Salsola oppositifolia*, *Halogeton*, *Hammada*, and *Haloxylon*. This might indicate that this C<sub>4</sub> lineage could have inherited C<sub>4</sub> or antecedent traits from a parental lineage giving them an adaptive advantage which might have influenced their photosynthesis pathway, e.g. adaptations in photosynthesis or photorespiration associated enzymes or Kranz-cells. We also found hybridization events in the aforementioned two clades in the other networks with similar parental lineages, supporting the evidence that these lineages were involved in hybridization events. This could indicate either an incomplete reproductive barrier in the early lineages and recurrent backcrossing or incidences of horizontal gene transfer. We have to keep in mind though that our sampling is limited and that other lineages not sampled in the C<sub>4</sub> clade might also play a role (see Schüssler *et al.*, 2017 for a plastid tree of the Salsoloideae).

Another explanation for the observed picture could be horizontal gene transfer (HGT). Dunning *et al.* (2019) showed that an individual of *Alloteropsis semialata* (Paniceae, Poaceae) contained at least 59 genes which were acquired via horizontal gene transfer (HGT) from approximately nine different grass donors often growing in close proximity. The mechanism is not determined as of yet though they assume allopolyploids which backcrossed with diploids, occasional interspecific cell-to-cell contact through root-to-root interaction as well as illegitimate pollination could be possibilities. Of these, HGTs functional genes included photosynthetic

genes alongside genes incorporated in disease resistance and abiotic stress response (Dunning *et al.*, 2019). Key enzymes of the C<sub>4</sub> pathway were thus acquired by *Alloteropsis* which led to a switch to C<sub>4</sub> photosynthesis (Christin *et al.*, 2012). There are other examples of HGT occurring in green plants which can lead to adaptive innovations (reviewed in Chen *et al.*, 2021). Just like grasses, *Salsola* is wind pollinated and a similar occurrence of illegitimate pollination as described in Christin *et al.* (2012) and Roalson (2012) is not ruled out. However, the only *Salsola* currently growing in close proximity to the *Salsola divaricata* agg. is *S. oppositifolia*.

### **Trees of photosynthetic genes supports the hybrid origin hypothesis and suggests candidate genes for further study**

A closer look at c. 50 gene trees of genes or gene families involved in photosynthesis or photorespiration revealed the same overall pattern, namely incongruence regarding the position of the *Salsola divaricata* agg. which in most cases either groups with the C<sub>3</sub> *S. montana* (also the case in the plastid dataset) or with the C<sub>4</sub> species. This pattern could be explained by hybridization of parental C<sub>3</sub> and C<sub>4</sub> lineages giving rise to an allopolyploid *S. divaricata* agg. with an intermediate expression of photosynthetic traits. The populations of the *S. divaricata* agg. studied here are all tetraploid (D. Tefarikis, unpublished flow cytometry data). The ploidy level of *S. montana* is unknown. In the C<sub>4</sub> clade, ploidy levels from di-, tetra- and octoploid are present (Kew C-value database and D. Tefarikis, unpublished flow cytometry data).

The kranz-like salsoloid leaf type of the *S. divaricata* agg. (Schüssler *et al.*, 2017: Fig. 7), for example, might occur as in the case of the gene SHORTROOT, a C<sub>4</sub> associated transcription factor which influences the development of kranz cells (Kelly *et al.*, 2017, Slewinski *et al.* 2014), with expression of the parental C<sub>4</sub> copy. Studying transcriptome profiles of Salsoleae and Camphorosmeae leaves, respectively, Lauterbach *et al.* (2017a) and Siadjeu *et al.* (2021) revealed a high expression of SHORTROOT in C<sub>2</sub> species. In case of PEPC two copies were sequenced and for both the *S. divaricata* agg. group with the C<sub>3</sub> species supporting the C<sub>3</sub>-like PEPC activity data found in this study.

### **Conclusions**

The phylogenetic signal in our trees, gene trees and networks indicate hybridization events gave rise to the *Salsola divaricata* agg. Furthermore, the broad but independent segregation of three photosynthetic traits in a C<sub>3</sub>-C<sub>4</sub> intermediate range without indication of selection for a more C<sub>4</sub>-like expression supports a hybrid origin of this C<sub>2</sub> clade. Overall the photosynthetic traits



seem plastic and genetically fixed stress reactions are not prominent among the populations studied. The *Salsola divaricata* agg. is well adapted to a broad range of climatic conditions including mesic to arid coastal habitats and also to salinity. Part of the success of the species aggregate might be the photorespiratory pump acquired through hybridization with a C<sub>4</sub> lineage in the past. We therefore conclude that this C<sub>2</sub> species aggregate does not represent an evolutionary stepping stone towards C<sub>4</sub>; rather the more likely explanation is a hybrid origin. However, a broader sampled phylogenomic study is needed to reveal the parental lineages. We propose that hybridization events might also have influenced the evolutionary history of other C<sub>2</sub> lineages, and that in particular those genera on which the model of C<sub>4</sub> evolution was based should be tested.

## Conflict of Interest

The authors declare that the research was conducted in the absence of any commercial or financial relationships that could be construed as a potential conflict of interest.

## Author Contributions

GK designed the study. DT and GE (carbon isotope values) measured the trait data and DT analysed them. DT, DMB and YY conducted the phylogenomic analyses and hybridization networks. DMB prepared the figures. DT, GK and DMB wrote the first draft. All authors contributed to the discussion of the results and the final version of the manuscript.

## Funding

Funding for this project came from the German Science Foundation (DFG grant KA1816/9-1) and the University of Minnesota.

## Acknowledgements

We thank the collectors of seeds of the *Salsola divaricata* agg. for their great help to start this project, in particular R. Barone, V. Boehlke, H. Freitag, J. Gil González, F. Hernández, M. Olangua Corral, S. Scholz and E. Voznesenskaya. We are grateful to C. Wild for cultivating and maintaining the plants for this project. For conducting a part of the carbon isotope measurements we thank M. Maus (Geology Department University of Mainz). The Minnesota Supercomputing Institute provided access to computational resources.

## Data Availability Statement

The datasets analyzed for this study can be found in the NCBI Sequence Read Archive (SRA) (see **Table 2** for SRA accession numbers).

## References

- Bender MM, Rouhani I, Vines HM, Black CC. 1973.** 13C/12C Ratio Changes in Crassulacean Acid Metabolism Plants. *Plant Physiology* **52**: 427–430. doi:10.1104/pp.52.5.427
- Björkman O, Gauhl E, Nobs MA. 1969.** Comparative studies of *Atriplex* Species with and without beta-Carboxylation photosynthesis and their first-generation hybrid. *Yearbook 68 of the Carnegie Institution of Washington*, 620–633.
- Blischak PD, Chifman J, Wolfe AD, Kubatko LS. 2018.** HyDe: A Python Package for Genome-Scale Hybridization Detection (D Posada, Ed.). *Systematic Biology* **67**: 821–829. doi:10.1093/sysbio/syy023
- Bräutigam A, Gowik U. 2016.** Photorespiration connects C<sub>3</sub> and C<sub>4</sub> photosynthesis. *Journal of Experimental Botany* **67**: 2953–2962. doi:10.1093/jxb/erw056.
- Brown R, Bouton JH. 1993.** Physiology and Genetics of Interspecific Hybrids Between Photosynthetic Types. *Annual Review of Plant Physiology and Plant Molecular Biology* **44**: 435–456. doi:10.1146/annurev.pp.44.060193.002251
- Brown RH, Byrd GT, Bouton JH, Bassett CL. 1993.** Photosynthetic Characteristics of Segregates from Hybrids between *Flaveria brownii* (C<sub>4</sub> Like) and *Flaveria linearis* (C<sub>3</sub>-C<sub>4</sub>). *Plant Physiology* **101**: 825–831. doi: 10.1104/pp.101.3.825
- Brullo AS. 1982.** Notes on the genus *Salsola* (Chenopodiaceae). 1. The *Salsola oppositifolia* and *S. longifolia* groups. *Willdenowia* **12**: 241–247. <http://www.jstor.org/stable/3995936>
- Cameron RG, Bassett CL, Bouton JH, Brown RH. 1989.** Transfer of C<sub>4</sub> Photosynthetic Characters through Hybridization of *Flaveria* Species. *Plant Physiology* **90**: 1538–1545. doi: 10.1104/pp.90.4.1538
- Chen R, Huangfu L, Lu Y, Fang H, Xu Y, Li P, Zhou Y, Xu C, Huang J, Yang Z. 2021.** Adaptive innovation of green plants by horizontal gene transfer. *Biotechnology Advances* **46**: 107671. doi:10.1016/j.biotechadv.2020.107671.

- Christin P-A, Edwards EJ, Besnard G, Boxall SF, Gregory R, Kellogg EA, Hartwell J, Osborne CP. 2012.** Adaptive Evolution of C<sub>4</sub> Photosynthesis through Recurrent Lateral Gene Transfer. *Current Biology* **22**: 445–449. doi:10.1016/j.cub.2012.01.054.
- Dunning LT, Olofsson JK, Parisod C, Choudhury RR, Moreno-Villena JJ, Yang Y, Dionora J, Quick WP, Park M, Bennetzen JL, et al. 2019.** Lateral transfers of large DNA fragments spread functional genes among grasses. *Proceedings of the National Academy of Sciences* **116**: 4416–4425. doi:10.1073/pnas.1810031116.
- Edwards GE, Ku MSB. 1987.** Biochemistry of C<sub>3</sub>-C<sub>4</sub> intermediates. In: Hatch MD, Boardman NK, eds. *The Biochemistry of Plants, Volume 10 Photosynthesis*. New York, USA: Academic Press, 275-325.
- Fennane M, Ibn Tattou M. 1998.** Catalogue des plantes vasculaires rares, menacées ou endémiques du Maroc. *Boccone* **8**: 1–243.
- García-Herrera R, Gallego D, Hernández E, Gimeno L, Ribera P, Calvo N. 2003.** Precipitation trends in the Canary Islands. *International Journal of Climatology* **23**: 235–241. doi:10.1175/1520-0442(2001)014<3889:IOTNAO>2.0.CO;2.
- Holaday AS, Talkmitt S, Doohan ME. 1985.** Anatomical and enzymic studies of leaves of a C<sub>3</sub> × C<sub>4</sub> *Flaveria* F<sub>1</sub> hybrid exhibiting reduced photorespiration. *Plant Science* **41**: 31–39. doi:10.1016/0168-9452(85)90062-7.
- Kadereit G, Bohley K, Lauterbach M, Tefarikis DT, Kadereit JW. 2017.** C<sub>3</sub>-C<sub>4</sub> intermediates may be of hybrid origin – a reminder. *New Phytologist* **215**: 70–76. doi:10.1111/nph.14567.
- Kalyaanamoorthy S, Minh BQ, Wong TKF, von Haeseler A, Jermiin LS. 2017.** ModelFinder: fast model selection for accurate phylogenetic estimates. *Nature Methods* **14**: 587–589. doi:10.1038/nmeth.4285.
- Kelly S, Covshoff S, Wanchana S, Thakur V, Quick P, Wang Y, Ludwig M, Bruskewich R, Fernie A, Sage RF, et al. 2017.** Wide sampling of natural diversity identifies novel molecular signatures of C<sub>4</sub> photosynthesis. *bioRxiv*. doi:https://doi.org/10.1101/163097.
- Lauterbach M, Billakurthi K, Hankeln TM, Westhoff P, Gowik U, Kadereit G. 2017a.** Organ-specific gene expression profiling of cotyledons and leaves of C<sub>4</sub> *Salsola oppositifolia* and insights into regulation of C<sub>2</sub> and C<sub>4</sub> photosynthesis in Salsola. In:

- Lauterbach M. *C<sub>4</sub> photosynthesis in Salsoleae: Ontogenetic gene expression profiling of closely related C<sub>3</sub>, C<sub>3</sub>-C<sub>4</sub> and C<sub>4</sub> species using RNA-Seq*. PhD thesis, Mainz, Germany.
- Lauterbach M, Billakurthi K, Kadereit G, Ludwig M, Westhoff P, Gowik U. 2017. C<sub>3</sub> cotyledons are followed by C<sub>4</sub> leaves: Intra-individual transcriptome analysis of *Salsola soda* (Chenopodiaceae). *Journal of Experimental Botany* **68**: 161–176. doi:10.1093/jxb/erw343.
- Lundgren MR. 2020. C<sub>2</sub> photosynthesis: a promising route towards crop improvement? *New Phytologist* **228**: 1734–1740. doi:10.1111/nph.16494.
- Monson RK, Edwards GE. 1984. C<sub>3</sub>-C<sub>4</sub> Intermediate Photosynthesis in Plants. *BioScience* **34**: 563–574. doi:10.2307/1309599
- Morales-Briones DF, Kadereit G, Tefarikis DT, Moore MJ, Smith SA, Brockington SF, Timoneda A, Yim WC, Cushman JC, Yang Y. 2021. Disentangling Sources of Gene Tree Discordance in Phylogenomic Datasets: Testing Ancient Hybridizations in Amaranthaceae s.l. *Systematic Biology* **70**: 219–235. doi:10.1093/sysbio/syaa066.
- Nguyen L-T, Schmidt HA, von Haeseler A, Minh BQ. 2015. IQ-TREE: A Fast and Effective Stochastic Algorithm for Estimating Maximum-Likelihood Phylogenies. *Molecular Biology and Evolution* **32**: 268–274. doi:10.1093/molbev/msu300.
- Oakley JC, Sultmanis S, Stinson CR, Sage TL, Sage RF. 2014. Comparative studies of C<sub>3</sub> and C<sub>4</sub> *Atriplex* hybrids in the genomics era: physiological assessments. *Journal of Experimental Botany* **65**: 3637–3647. doi:10.1093/jxb/eru106.
- Padrón Mederos MA. 2012. *Caracterización morfológica y genética de especies arbustivas de los géneros Salsola L. y Suaeda Forssk. ex J.F. Gmel. en las Islas Canarias*. PhD thesis, Universidad de La Laguna, San Cristóbal de La Laguna, Santa Cruz de Tenerife, España.
- Pease JB, Brown JW, Walker JF, Hinchliff CE, Smith SA. 2018. Quartet Sampling distinguishes lack of support from conflicting support in the green plant tree of life. *American Journal of Botany* **105**: 385–403. doi:10.1002/ajb2.1016.
- Reyna-Llorens I, Hibberd JM. 2017. Recruitment of pre-existing networks during the evolution of C<sub>4</sub> photosynthesis. *Philosophical Transactions of the Royal Society B: Biological Sciences* **372**: 20160386. <http://dx.doi.org/10.1098/rstb.2016.0386>
- Roalson EH. 2012. C<sub>4</sub> Photosynthesis: Need a Gene? Borrow One! *Current Biology* **22**: R161–

- R163. doi:10.1016/j.cub.2012.01.043.
- Sage RF. 2004.** The evolution of C<sub>4</sub> photosynthesis. *New Phytologist* **161**: 341–370. doi:10.1046/j.1469-8137.2004.00974.x.
- Sage RF, Christin PA, Edwards EJ. 2011.** The C<sub>4</sub> plant lineages of planet Earth. *Journal of Experimental Botany* **62**: 3155–3169. doi:10.1093/jxb/err048.
- Sage RF, Khoshravesh R, Sage TL. 2014.** From proto-Kranz to C<sub>4</sub> Kranz: building the bridge to C<sub>4</sub> photosynthesis. *Journal of experimental botany* **65**: 3341–3356. doi:10.1093/jxb/eru180.
- Sage RF. 2016.** Tracking the evolutionary rise of C<sub>4</sub> metabolism. *Journal of Experimental Botany* **67**: 2919–2922. doi:10.1093/jxb/erw137
- Sage RF, Monson RK, Ehleringer JR, Adachi S, Pearcy RW. 2018.** Some like it hot: the physiological ecology of C<sub>4</sub> plant evolution. *Oecologia* **187**: 941–966. doi:10.1007/s00442-018-4191-6.
- Sage RF, Sage TL, Kocacinar F. 2012.** Photorespiration and the Evolution of C<sub>4</sub> Photosynthesis. *Annual Review of Plant Biology* **63**: 19–47. doi:10.1146/annurev-arplant-042811-105511.
- Salichos L, Stamatakis A, Rokas A. 2014.** Novel Information Theory-Based Measures for Quantifying Incongruence among Phylogenetic Trees. *Molecular Biology and Evolution* **31**: 1261–1271. doi:10.1093/molbev/msu061.
- Sayyari E, Mirarab S. 2016.** Fast Coalescent-Based Computation of Local Branch Support from Quartet Frequencies. *Molecular Biology and Evolution* **33**: 1654–1668. doi:10.1093/molbev/msw079.
- Schlüter U, Weber APM. 2016.** The Road to C<sub>4</sub> Photosynthesis: Evolution of a Complex Trait via Intermediary States. *Plant and Cell Physiology* **57**: 881–889. doi:10.1093/pcp/pcw009.
- Schulze S, Westhoff P, Gowik U. 2016.** Glycine decarboxylase in C<sub>3</sub>, C<sub>4</sub> and C<sub>3</sub>-C<sub>4</sub> intermediate species. *Current Opinion in Plant Biology* **31**: 29–35. doi:10.1016/j.pbi.2016.03.011.
- Schüssler C, Freitag H, Koteyeva N, Schmidt D, Edwards G, Voznesenskaya E, Kadereit G. 2017.** Molecular phylogeny and forms of photosynthesis in tribe Salsoleae

- (Chenopodiaceae). *Journal of Experimental Botany* **68**: 207–223.  
doi:10.1093/jxb/erw432.
- Schwarz G. 1978.** Estimating the Dimension of a Model. *The Annals of Statistics* **6**: 461–464.  
doi:10.1214/aos/1176344136.
- Siadjeu C, Lauterbach M, Kadereit G. 2021.** Insights into regulation of C<sub>2</sub> and C<sub>4</sub> photosynthesis in Amaranthaceae/Chenopodiaceae using RNA-Seq. *bioRxiv*: 2021.09.14.460237. doi:10.1101/2021.09.14.460237.
- Slewinski TL, Anderson AA, Price S, Withee JR, Gallagher K, Turgeon R. 2014.** Short-Root1 Plays a Role in the Development of Vascular Tissue and Kranz Anatomy in Maize Leaves. *Molecular Plant* **7**: 1388–1392. doi:10.1093/mp/ssu036.
- Smith SA, Moore MJ, Brown JW, Yang Y. 2015.** Analysis of phylogenomic datasets reveals conflict, concordance, and gene duplications with examples from animals and plants. *BMC Evolutionary Biology* **15**: 150. doi:10.1186/s12862-015-0423-0.
- Stamatakis A. 2014.** RAxML version 8: a tool for phylogenetic analysis and post-analysis of large phylogenies. *Bioinformatics* **30**: 1312–1313. doi:10.1093/bioinformatics/btu033.
- Sugiura N. 1978.** Further analysts of the data by akaike's information criterion and the finite corrections. *Communications in Statistics - Theory and Methods* **7**: 13–26. doi:10.1080/03610927808827599.
- Than C, Ruths D, Nakhleh L. 2008.** PhyloNet: A software package for analyzing and reconstructing reticulate evolutionary relationships. *BMC Bioinformatics* **9**: 1–16. doi:10.1186/1471-2105-9-322.
- von Caemmerer S. 1992.** Carbon isotope discrimination in C<sub>3</sub>-C<sub>4</sub> intermediates. *Plant, Cell and Environment* **15**: 1063–1072. doi:10.1111/j.1365-3040.1992.tb01656.x.
- Voznesenskaya E V, Koteyeva NK, Akhani H, Roalson EH, Edwards GE. 2013.** Structural and physiological analyses in Salsoleae (Chenopodiaceae) indicate multiple transitions among C<sub>3</sub>, intermediate, and C<sub>4</sub> photosynthesis. *Journal of Experimental Botany* **64**: 3583–3604. doi:10.1093/jxb/ert191.
- Yang Y, Smith SA. 2014.** Orthology inference in nonmodel organisms using transcriptomes and low-coverage genomes: Improving accuracy and matrix occupancy for phylogenomics. *Molecular Biology and Evolution* **31**: 3081–3092.

doi:10.1093/molbev/msu245.

**Yu Y, Nakhleh L. 2015.** A maximum pseudo-likelihood approach for phylogenetic networks.

*BMC Genomics* **16**: S10. doi:10.1186/1471-2164-16-S10-S10.

**Zhang C, Rabiee M, Sayyari E, Mirarab S. 2018.** ASTRAL-III: polynomial time species tree

reconstruction from partially resolved gene trees. *BMC bioinformatics* **19**: 15–30.

doi:10.1186/s12859-018-2129-y.



The following Supporting Information is available for this article:

**Fig. S1:** Carbon isotope values ( $\delta^{13}\text{C}(\text{‰})$ ) of different populations (P) of the *Salsola divaricata* agg. on the Canary islands and Morocco

**Fig. S2:** CO<sub>2</sub> compensation points ( $\Gamma$  in  $\mu\text{mol CO}_2 \text{ mol}^{-1}$ ) of populations (P) of the *Salsola divaricata* agg.

**Fig. S3:** a) Cladogram of Salsoloideae inferred from the Maximum likelihood analyses of the concatenated 991-nuclear gene supermatrix. b) Cladogram of Salsoloideae inferred from the ASTRAL analyses of 991 nuclear genes trees.

**Fig. S4:** A) RAxML cladogram of Salsoloideae inferred from the concatenated 991-nuclear gene supermatrix. B) ASTRAL Cladogram of Salsoloideae inferred from 991 nuclear genes trees.

**Fig S5:** Maximum likelihood phylogeny of Salsoloideae s.l. inferred from the IQ-TREE analysis of complete and partial plastomes.

**Fig. S6:** Maximum pseudo-likelihood species network inferred with PhyloNet with up to five hybridization events.

**Fig. S7:** HyDe boxplot of the distribution of the admixture parameters ( $\gamma$ ) from the 298 significant tests.

**Fig. S8:** Maximum likelihood cladograms of the 50 photosynthetic gene trees. Bootstrap support (BS) values are shown above the branches.

**Table S1:** Populations (named by living collection number in the Botanical Garden Mainz; see Fig. 1) included in the carbon isotope measurements, CO<sub>2</sub> compensation point measurements and PEPC activity measurements, including sampling location and collector.

**Table S2:** Gene and character occupancy of the concatenated matrix.

**Table S3:** HyDe results from the 298 significant tests.

**Materials and Methods S1:** More detailed description of methods of CO<sub>2</sub> compensation point, PEPC activity measurement, Transcriptome processing and nuclear phylogenetic analyses, Assessment of hybridization, Plastome assembly and phylogenetic analysis, and Analysis of photosynthetic gene trees.

**References Materials and Methods S1**

## Tables

**Table 1:** List of the 17 samples in the transcriptome phylogeny; with photosynthesis type, ploidy (Kew C value database 2018) and NCBI Sequence Read Archive (SRA) accession number.

| Species                                               | Tribe         | Ploidy | Photosynthesis type                       | SRA accession No.                                                      |
|-------------------------------------------------------|---------------|--------|-------------------------------------------|------------------------------------------------------------------------|
| <i>Anabasis articulata</i> Choul. ex Pomel            | Salsoleae     | NA     | C <sub>4</sub>                            | <a href="https://www.ncbi.nlm.nih.gov/sra/SRR6435311">SRR6435311</a>   |
| <i>Halogeton glomeratus</i> (M. Bieb.) C.A. Mey.      | Salsoleae     | 2x     | C <sub>4</sub>                            | <a href="https://www.ncbi.nlm.nih.gov/sra/SRR1503502">SRR1503502</a>   |
| <i>Haloxylon ammodendron</i> (C.A. Mey.) Bunge        | Salsoleae     | 2x     | C <sub>4</sub> (C <sub>3</sub> cotyledon) | <a href="https://www.ncbi.nlm.nih.gov/sra/SRR1697346">SRR1697346</a>   |
| <i>Hammada scoparia</i> (Pomel) Iljin                 | Salsoleae     | 2x     | C <sub>4</sub> (C <sub>3</sub> cotyledon) | <a href="https://www.ncbi.nlm.nih.gov/sra/ERR2060287">ERR2060287</a>   |
| <i>Kali collina</i> Akhani & Roalson                  | Salsoleae     | 2x     | C <sub>4</sub>                            | <a href="https://www.ncbi.nlm.nih.gov/sra/SRR6435349">SRR6435349</a>   |
| <i>Salsola divaricata</i> Moq. (Pop.184)              | Salsoleae     | 4x     | C <sub>2</sub>                            | <a href="https://www.ncbi.nlm.nih.gov/sra/ERR2060298">ERR2060298</a>   |
| <i>Salsola divaricata</i> Moq. (Pop.198)              | Salsoleae     | 4x     | C <sub>2</sub>                            | <a href="https://www.ncbi.nlm.nih.gov/sra/ERR2060294">ERR2060294</a>   |
| <i>Salsola genistoides</i> Juss. ex Poir.             | Salsoleae     | 4x     | C <sub>3</sub>                            | <a href="https://www.ncbi.nlm.nih.gov/sra/SRR14783909">SRR14783909</a> |
| <i>Salsola montana</i> Litv.                          | Salsoleae     | NA     | C <sub>3</sub> proto-kranz                | <a href="https://www.ncbi.nlm.nih.gov/sra/SRR14783908">SRR14783908</a> |
| <i>Salsola oppositifolia</i> Desf.                    | Salsoleae     | 8x     | C <sub>4</sub>                            | <a href="https://www.ncbi.nlm.nih.gov/sra/ERR2060302">ERR2060302</a>   |
| <i>Salsola soda</i> L.                                | Salsoleae     | 2x     | C <sub>4</sub> (C <sub>3</sub> cotyledon) | <a href="https://www.ncbi.nlm.nih.gov/sra/SRR3544552">SRR3544552</a>   |
| <i>Salsola verticillata</i> Schousb. (Pop.171)        | Salsoleae     | 4x     | C <sub>2</sub>                            | <a href="https://www.ncbi.nlm.nih.gov/sra/SRR14783907">SRR14783907</a> |
| <i>Salsola webbii</i> Moq.                            | Salsoleae     | 4x     | C <sub>3</sub>                            | <a href="https://www.ncbi.nlm.nih.gov/sra/ERR2060308">ERR2060308</a>   |
| <i>Caroxylon vermiculatum</i> (L.) Akhani & Roalson   | Caroxyloneae  | NA     | C <sub>4</sub>                            | <a href="https://www.ncbi.nlm.nih.gov/sra/SRR6435345">SRR6435345</a>   |
| <i>Bassia scoparia</i> (L.) A.J. Scott                | Camphorosmeae | 2x     | C <sub>4</sub>                            | <a href="https://www.ncbi.nlm.nih.gov/sra/ERR364385">ERR364385</a>     |
| <i>Eokochia saxicola</i> (Guss.) Freitag & G.Kadereit | Camphorosmeae | NA     | C <sub>3</sub>                            | <a href="https://www.ncbi.nlm.nih.gov/sra/SRR6435348">SRR6435348</a>   |
| <i>Beta vulgaris subsp. vulgaris</i> L.               | Beteae        | 2x     | C <sub>3</sub>                            | <a href="https://www.ncbi.nlm.nih.gov/sra/SRX335625">SRX335625</a>     |

**Table 2:** Model testing for 17 taxa and 991 gene trees. Comparing log likelihoods of the trees and networks. The best model is the network with three hybridization events from PhyloNet (best MPL run allowing four hybridization events). k = No. branch lengths + hybridization probabilities; h = number of hybridization events.

| tree/network              | ln L (log likelihood) | k  | h   | AIC       | deltaAIC | AICc      | deltaAICc | BIC       | deltaBIC  |
|---------------------------|-----------------------|----|-----|-----------|----------|-----------|-----------|-----------|-----------|
| astral_calgtp_rob         | -19754.54543          | 31 | N/A | 39571.091 | 1698.041 | 39573.130 | 1697.190  | 39722.951 | 1668.649  |
| raxml_calgtp_rob          | -19741.89558          | 31 | N/A | 39545.791 | 1672.742 | 39547.830 | 1671.891  | 39697.651 | 1643.349  |
| iqtree_plastome_calgtprob | -22836.08408          | 31 | N/A | 45734.168 | 7861.119 | 45736.207 | 7860.268  | 45886.028 | 7831.726  |
| phylonet_mpl_1hyb[1]      | -19451.79848          | 31 | 1   | 38965.597 | 1092.547 | 38967.636 | 1091.696  | 39117.457 | 1063.155  |
| phylonet_mpl_1hyb[2]      | -19605.00833          | 33 | 1   | 39276.017 | 1402.967 | 39278.323 | 1402.383  | 39437.674 | 1383.372  |
| phylonet_mpl_1hyb[3]      | -19624.56237          | 33 | 1   | 39315.125 | 1442.075 | 39317.431 | 1441.491  | 39476.782 | 1422.480  |
| phylonet_mpl_2hyb         | -19435.04197          | 35 | 2   | 38940.084 | 1067.034 | 38942.674 | 1066.734  | 39111.539 | 1057.237  |
| phylonet_mpl_3hyb         | -19276.12872          | 37 | 3   | 38626.257 | 753.208  | 38629.147 | 753.208   | 38807.510 | 753.208   |
| phylonet_mpl_4hyb         | -18899.52481          | 37 | 3   | 37873.050 | 0.000    | 37875.940 | 0.000     | 38054.302 | 0.000     |
| phylonet_mpl_5hyb         | -19283.48635          | 41 | 5   | 38648.973 | 775.923  | 38652.512 | 38652.512 | 38849.820 | 38849.820 |
